# Supplementary material for: A new type of SO3H-functionalized magnetic-titania as a robust magnetically-recoverable solid acid nanocatalyst for multi-component reactions
Source: Royal Society of Chemistry journal article supplement (doi:10.1039/c6ra21048a), 2016-01-01
Supplement: c6ra21048a1.pdf [file c6ra21048a1.pdf]

## Supporting information

### **A new type of SO<sub>3</sub>H-functionalized magnetic-titania as a robust magnetically-recoverable solid acid nanocatalyst for multi-component reactions**

Elham Tabrizian and Ali Amoozadeh\*

**3,3-dimethyl-12-phenyl-3,4,5,12-tetrahydrobenzo[4,5]imidazo[2,1-b]quinazolin-1(2H)-one**

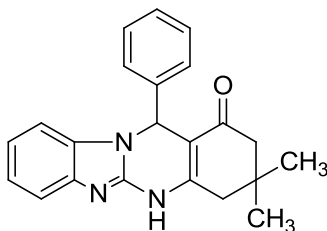

M. P.: 318-320 °C. FT-IR (KBr)  $\nu$   $\text{cm}^{-1}$  = 1569, 1647, 2956, 3367.  $^1\text{H}$  NMR (300 MHz,  $\text{DMSO-}d^6$ ):  $\delta$  1.06 (s, 3H,  $\text{CH}_3$ ), 1.17 (s, 3H,  $\text{CH}_3$ ), 2.23-2.37 (dd,  $J$ = 16.43, 30.48 Hz, 2H,  $\text{CH}_2$ ), 2.67 (s, 2H,  $\text{CH}_2$ ), 6.49 (s, 1H, CH), 7.09-7.65 (m, 9H, Ar-H), 10.87 (s, 1H, NH).  $^{13}\text{C}$  NMR (75 MHz,  $\text{DMSO-}d^6$ )  $\delta$ : 26.73, 26.43, 31.79, 35.92, 49.99, 58.15, 112.56, 119.77, 125.57, 125.67, 126.19, 127.44, 127.66, 128.13, 132.02, 132.87, 142.05, 158.48, 158.53, 162.57, 195.73.

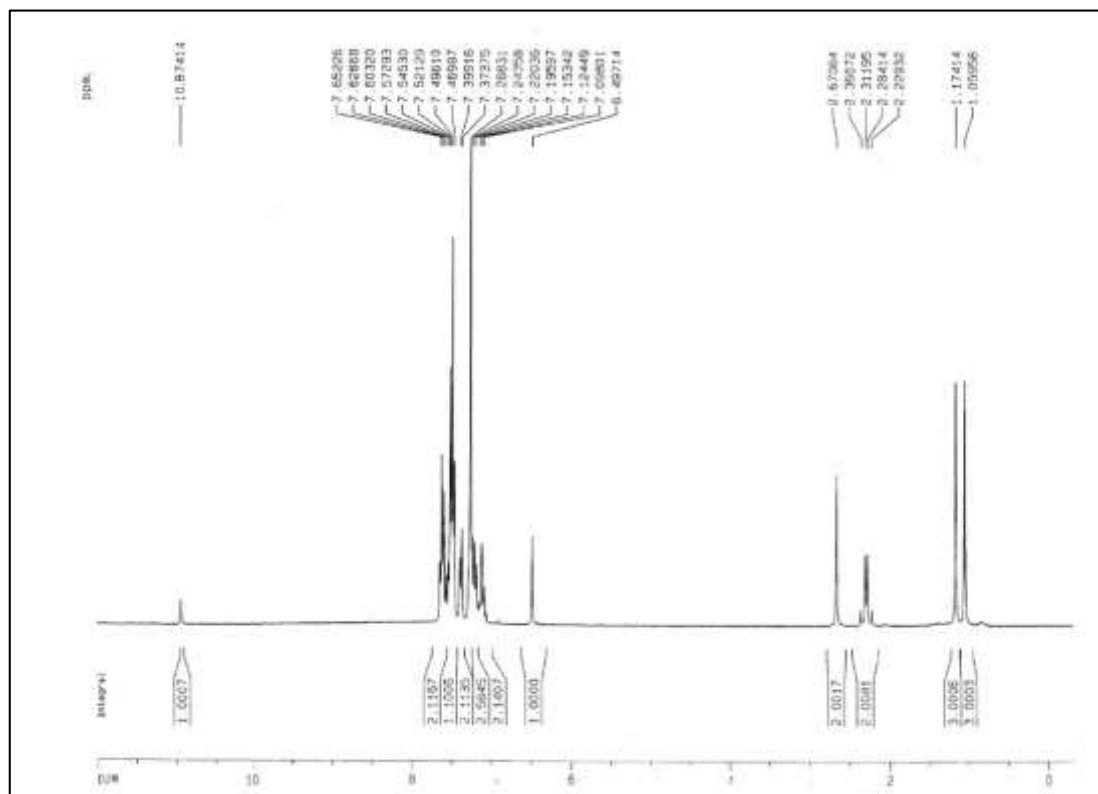

**Fig. 1.**  $^1\text{H}$  NMR

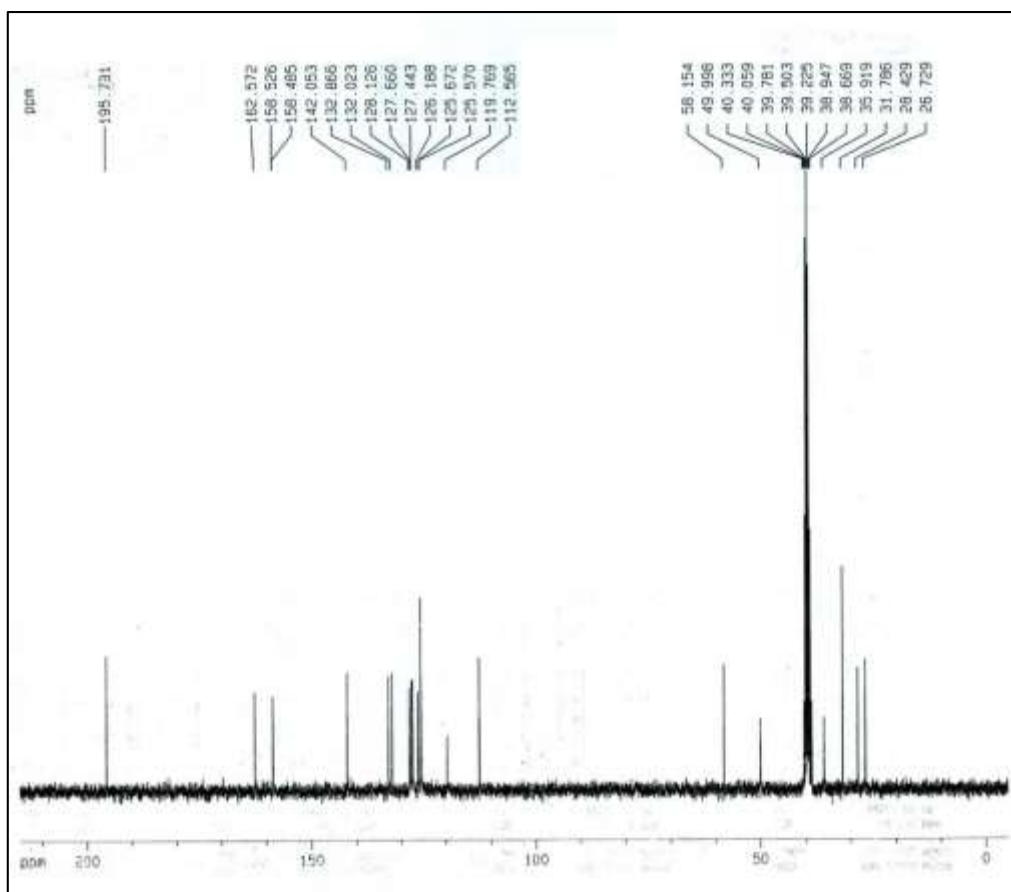

**Fig. 2.**  $^{13}\text{C}$  NMR

**12-(4-fluorophenyl)-3,3-dimethyl-3,4,5,12-tetrahydrobenzo[4,5]imidazo[2,1-b]quinazolin-1(2H)-one**

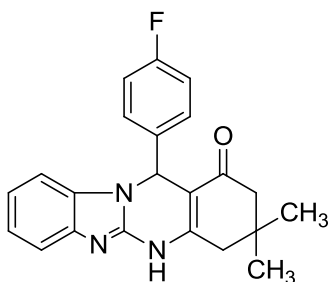

M. P.: 325-326 °C. FT-IR (KBr)  $\nu$   $\text{cm}^{-1}$  = 1565, 1652, 2958, 3361.  $^1\text{H}$  NMR (300 MHz,  $\text{DMSO-}d^6$ ):  $\delta$  1.07 (s, 3H,  $\text{CH}_3$ ), 1.18 (s, 3H,  $\text{CH}_3$ ), 2.25-2.36 (dd,  $J$ = 11.23, 22.56 Hz, 2H,  $\text{CH}_2$ ), 2.77 (s, 2H,  $\text{CH}_2$ ), 6.48 (s, 1H, CH), 7.10-7.76 (m, 8H, Ar-H), 10.91 (s, 1H, NH).  $^{13}\text{C}$  NMR (75 MHz,  $\text{DMSO-}d^6$ )  $\delta$ : 26.83, 28.53, 31.87, 35.94, 50.20, 58.18, 112.36, 119.56, 125.47, 125.67, 126.28, 127.44, 127.66, 128.23, 132.42, 132.94, 142.15, 158.59, 158.73, 162.67, 196.01.

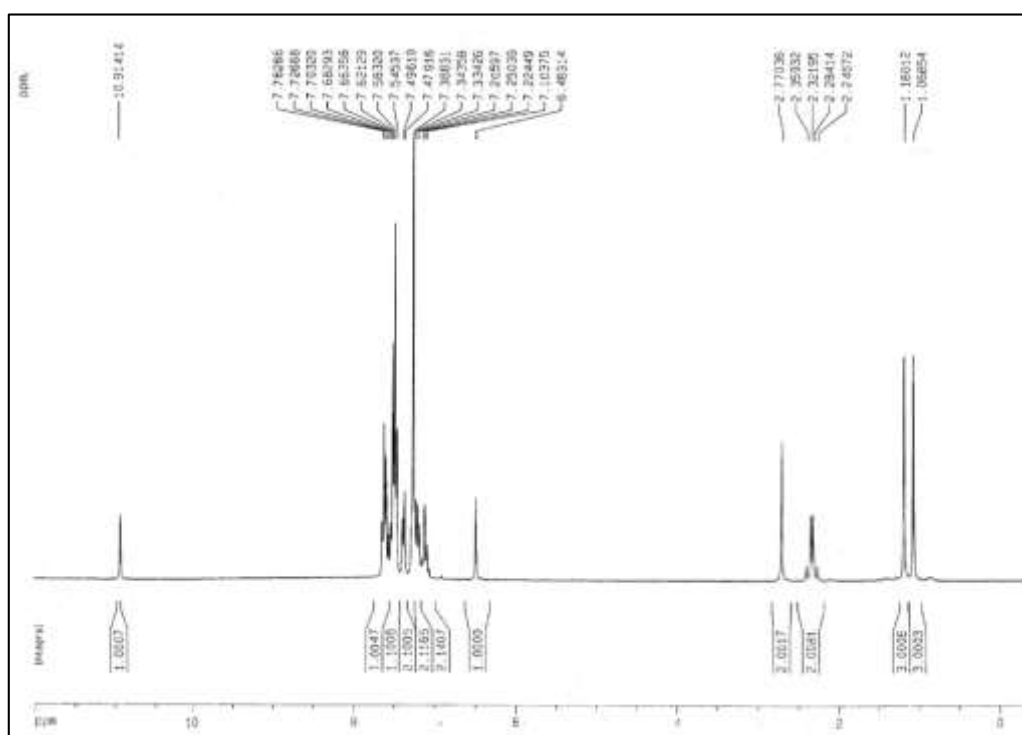

**Fig 3.**  $^1\text{H}$  NMR

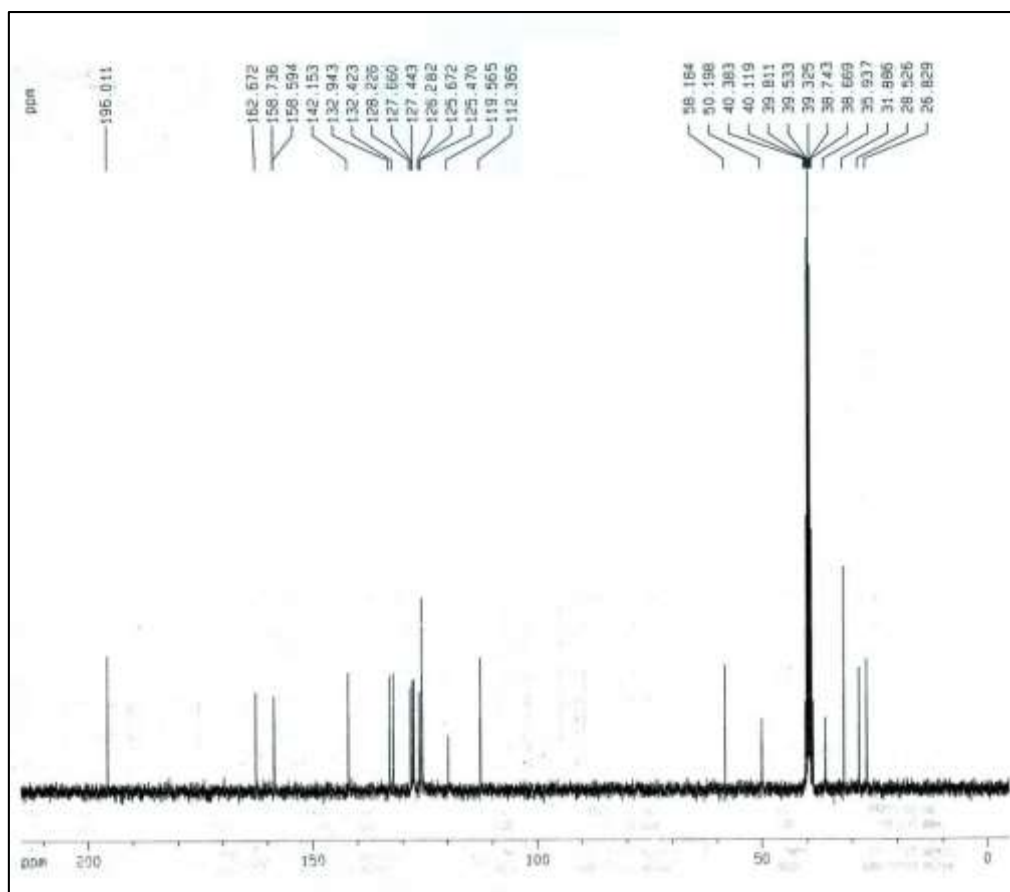

Fig 4.  $^{13}\text{C}$  NMR

**12-phenyl-3,4,5,12-tetrahydrobenzo[4,5]imidazo[2,1-b]quinazolin-1(2H)-one**

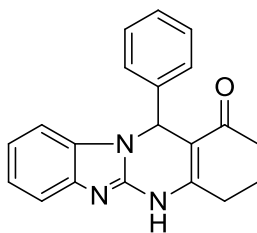

M. P.: 310-312 °C. FT-IR (KBr)  $\nu$   $\text{cm}^{-1}$  = 1560, 1666, 2968, 3370.  $^1\text{H}$  NMR (300 MHz,  $\text{DMSO-}d^6$ ):  $\delta$  1.86-1.93 (m, 2H,  $\text{CH}_3$ ), 2.23-2.29 (m, 2H,  $\text{CH}_3$ ), 2.59-2.61 (d,  $J$ = 5.05 Hz, 2H,  $\text{CH}_2$ ), 6.49 (s, 1H, CH), 7.09-7.90 (m, 9H, Ar-H), 11.11 (s, 1H, NH).  $^{13}\text{C}$  NMR (75 MHz,  $\text{DMSO-}d^6$ )  $\delta$ : 18.55, 19.73, 26.39, 30.14, 35.97, 49.99, 58.15, 112.64, 119.67, 125.56, 125.67, 126.28, 127.34, 127.54, 128.22, 132.13, 132.89, 142.08, 159.05, 159.09, 162.74, 196.04.

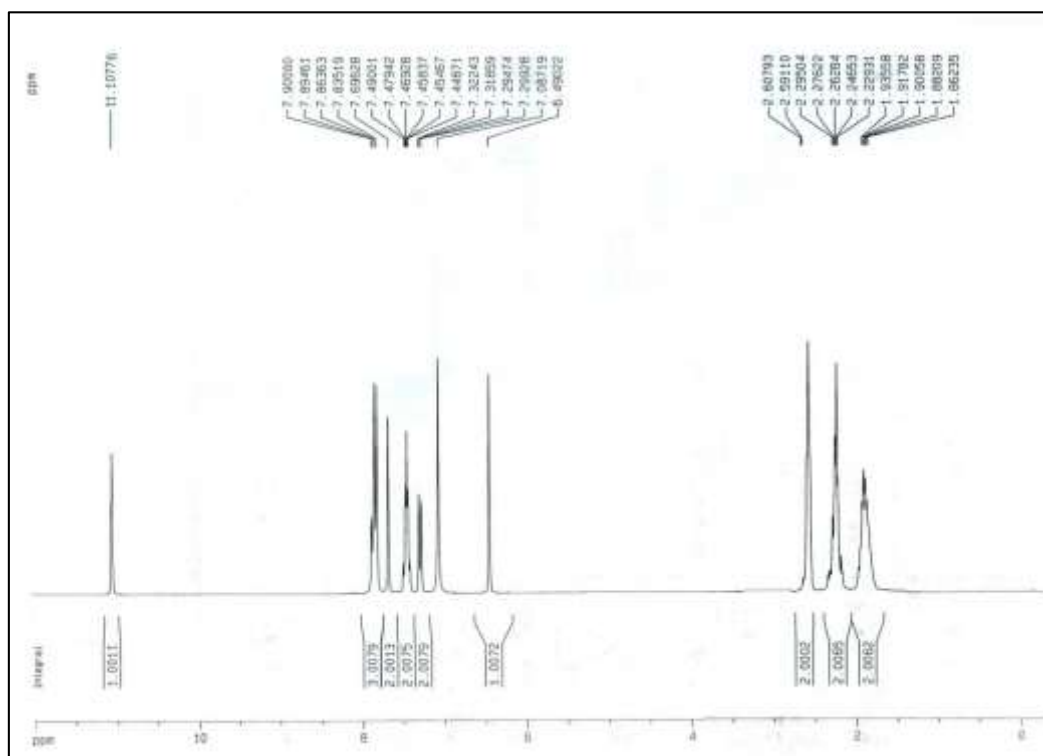

**Fig 5.**  $^1\text{H}$  NMR

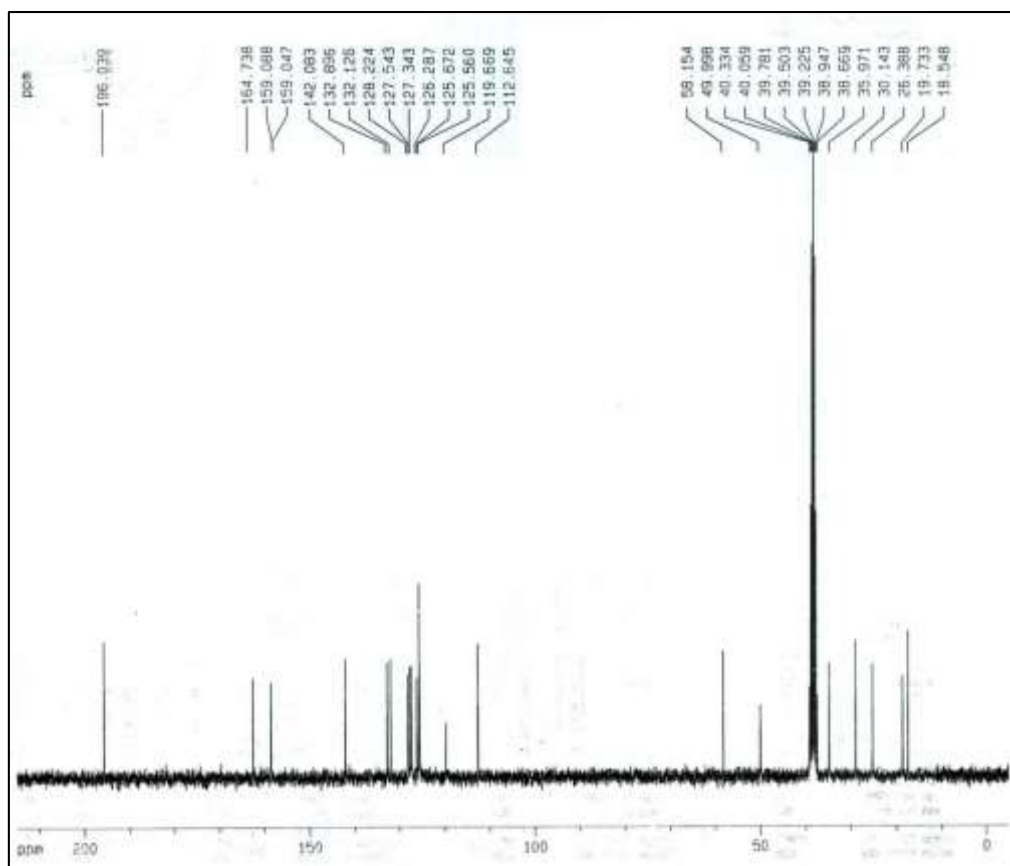

Fig 6.  $^{13}\text{C}$  NMR

**3,12-diphenyl-3,4,5,12-tetrahydrobenzo[4,5]imidazo[2,1-b]quinazolin-1(2H)-one**

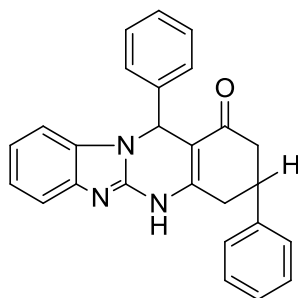

M. P: 332-335 °C. FT-IR (KBr)  $\nu$   $\text{cm}^{-1}$  = 1558, 1662, 2960, 3364.  $^1\text{H}$  NMR (300 MHz,  $\text{DMSO-}d^6$ ):  $\delta$  2.87-3.06 (m, 2H,  $\text{CH}_2$ ), 3.23-3.48 (t,  $J$ = 5.01, 2H,  $\text{CH}_2$ ), 3.51 (s, 1H, -CH), 6.41 (s, 1H, -CH), 6.42-7.35 (m, 14H, Ar-H), 10.93 (s, 1H, NH).  $^{13}\text{C}$  NMR (75 MHz,  $\text{DMSO-}d^6$ )  $\delta$ : 22.90, 23.43, 25.92, 33.52, 54.33, 107.01, 109.57, 116.78, 120.25, 121.54, 126.63, 126.89, 127.24, 127.86, 128.20, 140.95, 142.72, 159.07, 159.09, 162.81, 191.72.

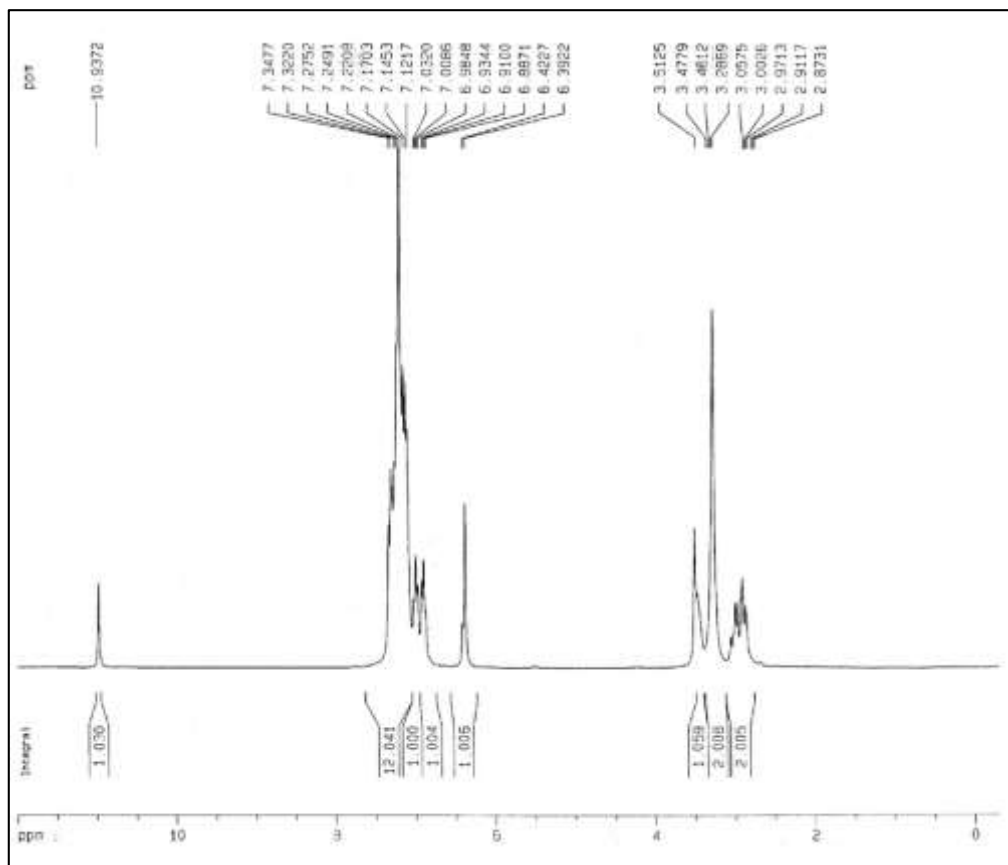

**Fig 7.**  $^1\text{H}$  NMR



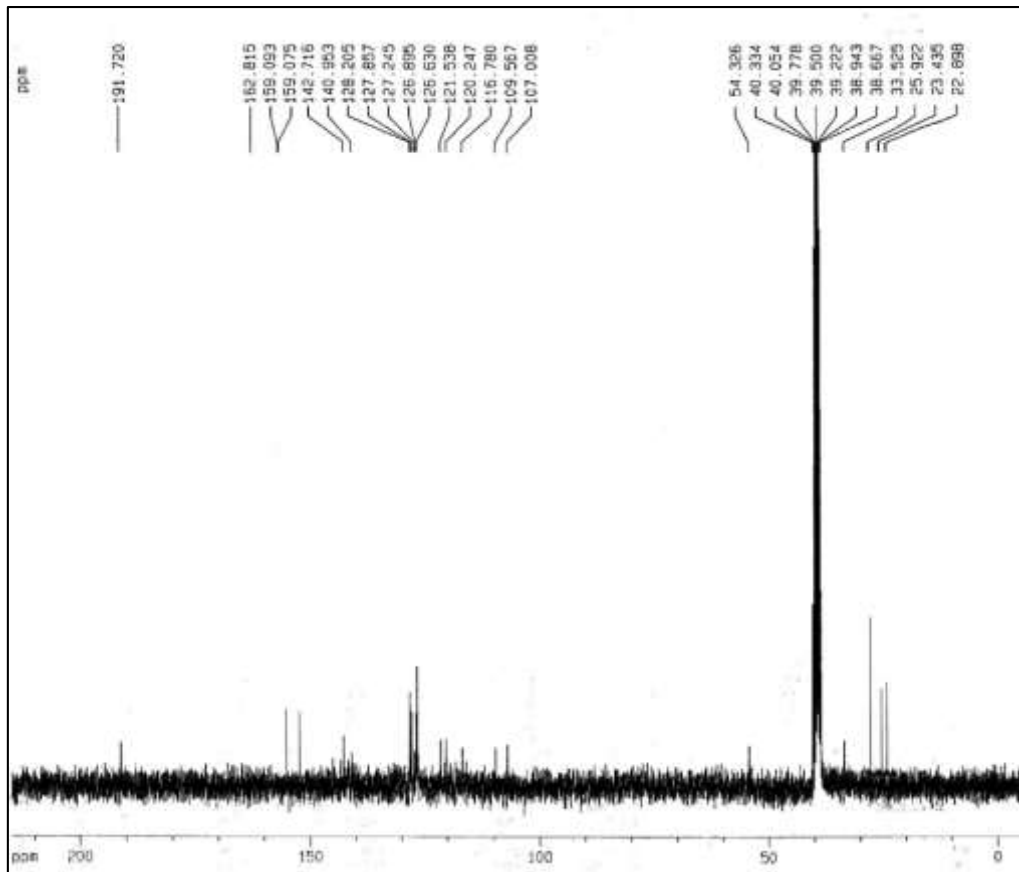

Fig 8.  $^{13}\text{C}$  NMR

### Ethyl 2-methyl-5-oxo-4-phenyl-4,6,7,8-tetrahydro-1H-quinoline-3-carboxylate

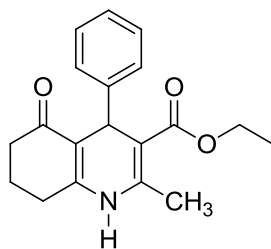

M.p. 240-241 °C FT-IR (KBr) 3296 (NH), 1641 (C=O) (acid), 1608 (C=O) (ketone), 1488 (OC<sub>2</sub>H<sub>5</sub>) (ester) cm<sup>-1</sup>;  $\delta$ H/ppm (300 MHz, CDCl<sub>3</sub>-*d*) 1.17 (t, 3H, CH<sub>3</sub>-CH<sub>2</sub>-C=O), 1.59 (m, 2H, CH<sub>2</sub>-CH<sub>2</sub>-CH<sub>2</sub>), 1.97 (m, 3H, CH<sub>3</sub>-Ph), 2.30-2.46 (m, 4H, CH<sub>2</sub>-CH<sub>2</sub>), 4.05 (q, 2H, -O-CH<sub>2</sub>-CH<sub>3</sub>), 5.01 (s, 1H, CH-Ph), 5.94 (s, 1H, NH), 7.08-7.31 (m, 5H, CH (Ph)).

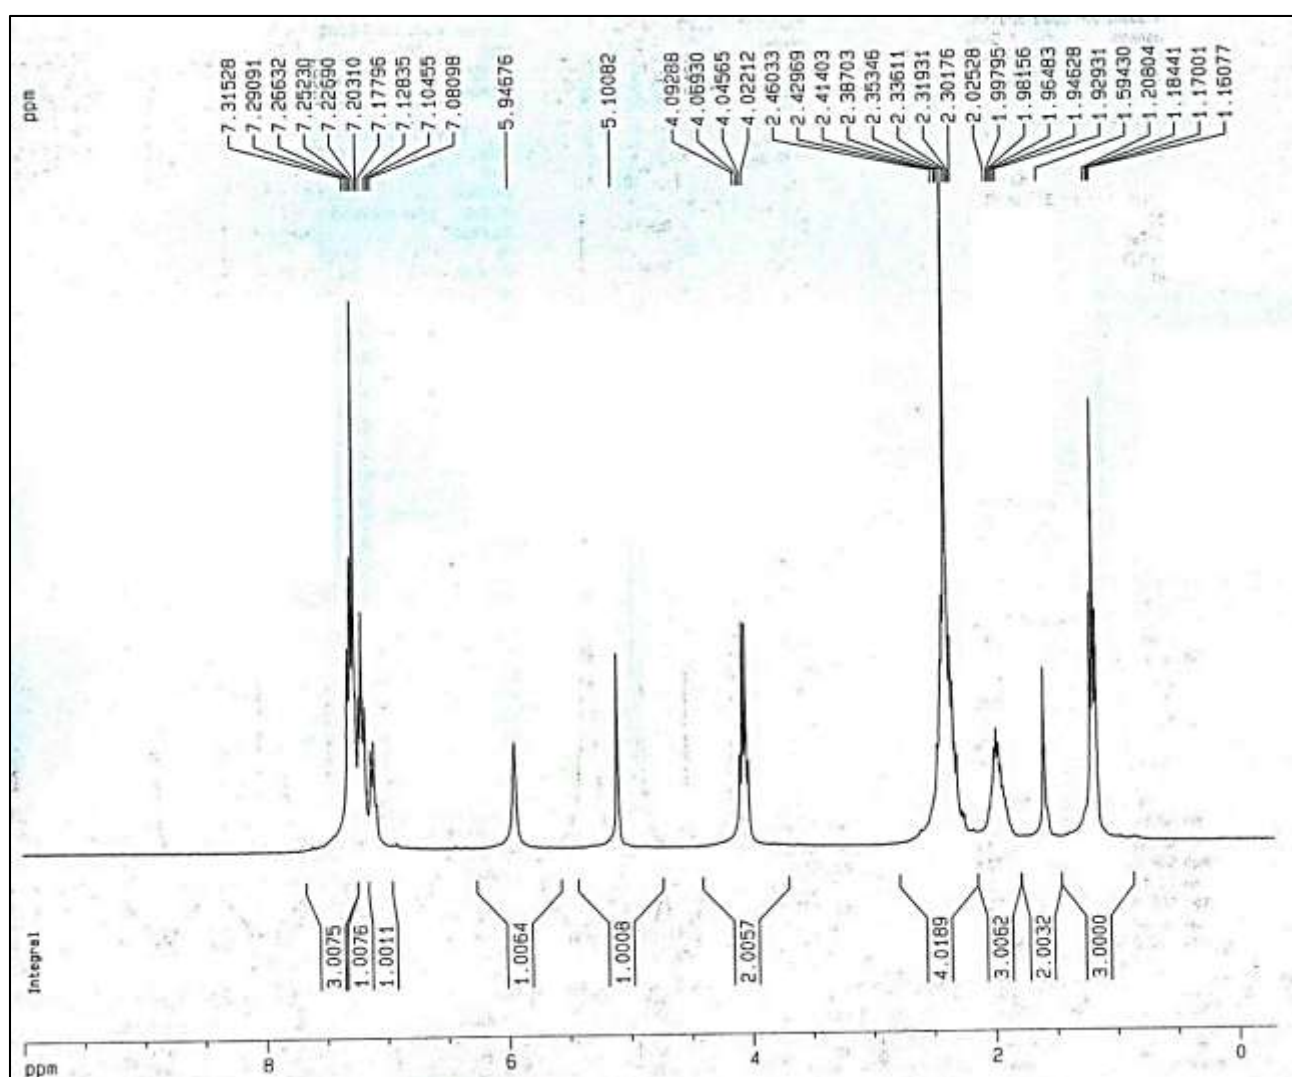

Fig. 9. <sup>1</sup>H NMR

**Ethyl 2,7,7-trimethyl-5-oxo-4-phenyl-1,4,5,6,7,8-hexahydroquinoline-3-carboxylate**

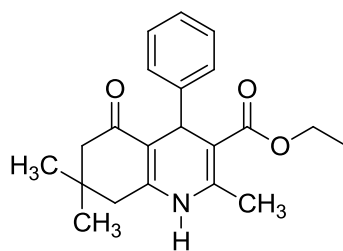

M.p. 200-202 °C, FT-IR (KBr) 3275 (NH), 3080 (CH), 1700 (C=O) (acid), 1610 (C=O) (ketone), 1480 (OC<sub>2</sub>H<sub>5</sub>) (ester), 1225 (OCH<sub>3</sub>) (ether) cm<sup>-1</sup>;  $\delta$ H/ ppm (400 MHz, CDCl<sub>3</sub>-d) 0.94 (s, 3H, CH<sub>3</sub>), 1.08 (s, 3H, CH<sub>3</sub>), 1.19-1.23 (t, J= 6.8 Hz, 3H, CH<sub>3</sub>-CH<sub>2</sub>-C=O), 2.14-2.35 (m, 4H, ), 4.05-4.10 (q, J=7.2, 2H, -O-CH<sub>2</sub>-CH<sub>3</sub>), 5.05 (s, 1H, CH-Ph), 6.42 (s, 1H, NH), 7.09-7.13 (t, J= 7.2, 1H, CH (Ph)), 7.19-7.23 (t, J= 7.2, 2H, CH (Ph)), 7.28-7.33 (m, 2H, CH (Ph));  $\delta$ C /ppm (100 MHz, CDCl<sub>3</sub>) 195.67, 167.5, 148.5, 147.06, 143.4, 128.02, 127.88, 126.03, 112.08, 106.05, 50.73, 40.9, 36.6, 32.7, 29.45, 27.14, 19.34, 14.21.

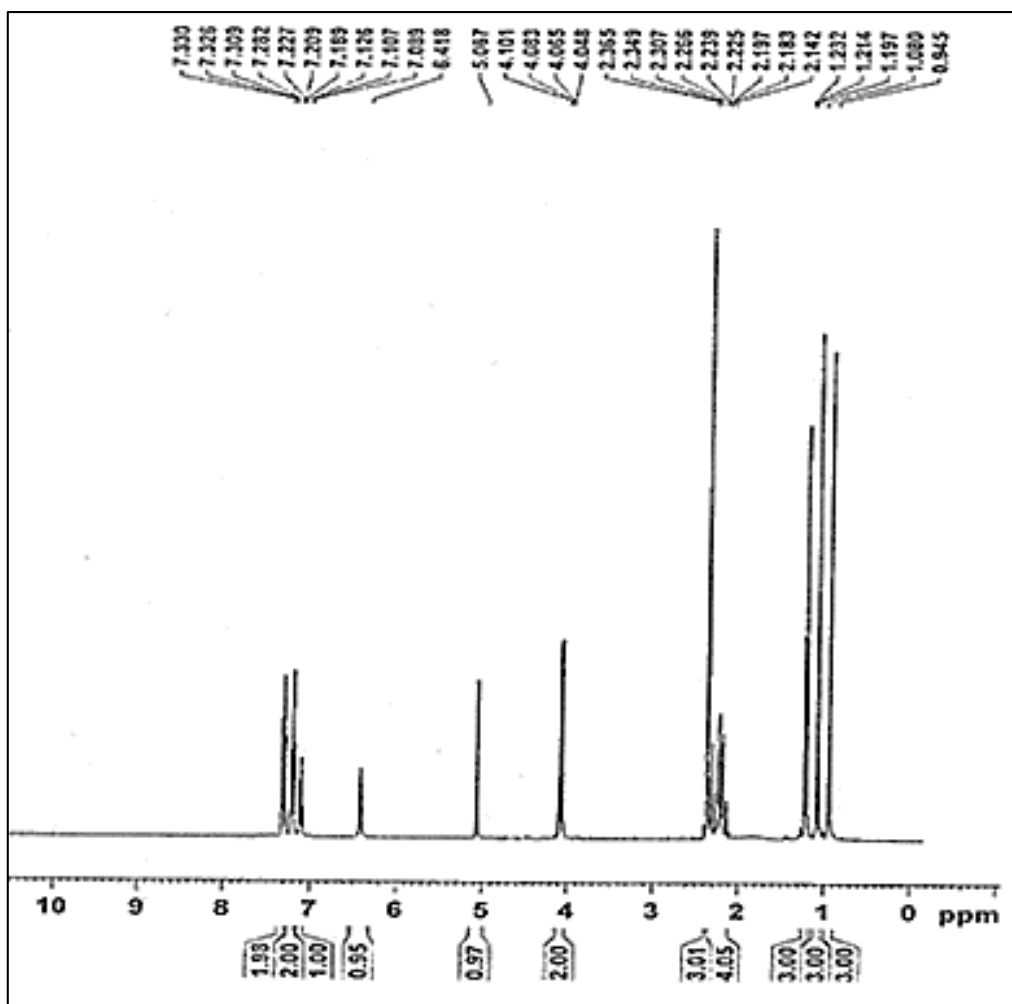

**Fig. 10.** <sup>1</sup>H NMR

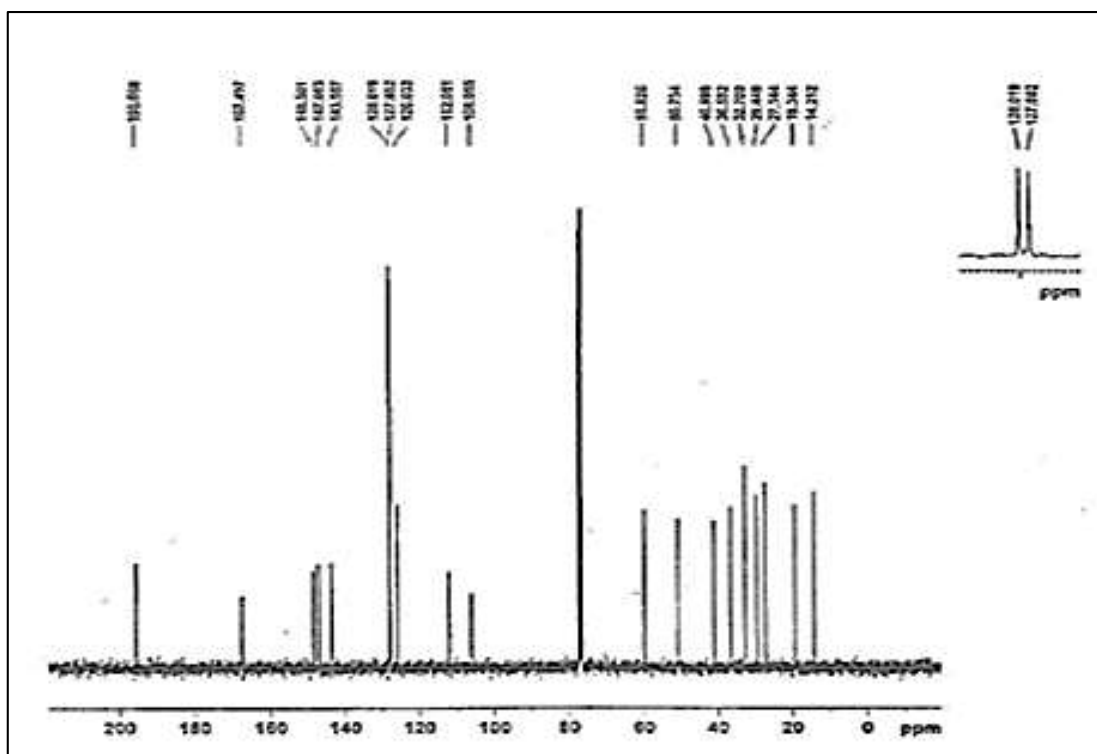

Fig. 11.  $^{13}\text{C}$  NMR

**Ethyl 2,7,7-trimethyl-4-(4-nitrophenyl)-5-oxo-1,4,5,6,7,8-hexahydroquinoline-3-carboxylate**

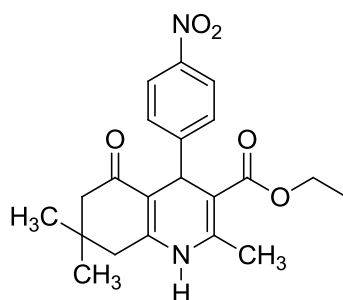

M.p. 209-211 °C, FT-IR (KBr) 3278 (NH), 3076 (CH), 1690 (C=O) (acid), 1615 (C=O) (ketone), 1482 (OC<sub>2</sub>H<sub>5</sub>) (ester), 1218 (OCH<sub>3</sub>) (ether) cm<sup>-1</sup>;  $\delta$ H/ ppm (400 MHz, CDCl<sub>3</sub>-d) 0.77 (s, 3H, CH<sub>3</sub>), 0.96 (s, 3H, CH<sub>3</sub>), 1.04-1.09 (t, J= 9.6 Hz, 3H, CH<sub>3</sub>-CH<sub>2</sub>-C=O), 1.90-2.22 (m, 2H, C-CH<sub>2</sub>-C=), 2.28 (s, 3H, CH<sub>3</sub>), 2.38 (s, 1H), 2.43-2.46 (t, J= 2, 1H), 3.30 (s, 1H), 3.88-3.95 (q, J= 9.6, 2H, -O-CH<sub>2</sub>-CH<sub>3</sub>), 4.93 (s, 1H, CH-Ph), 7.36-7.39 (d, J= 11.6, 2H, CH (Ph)), 8.04-8.07 (d, J= 20.4, 2H, CH (Ph)), 9.19 (s, 1H, NH);  $\delta$ C/ ppm (100 MHz, CDCl<sub>3</sub>) 194.32, 166.48, 161.96, 155.07, 150.17, 146.24, 145.73, 128.84, 123.24, 109.11, 102.46, 59.33, 50.14, 36.71, 32.22, 29.08, 26.52, 18.42, 14.16.

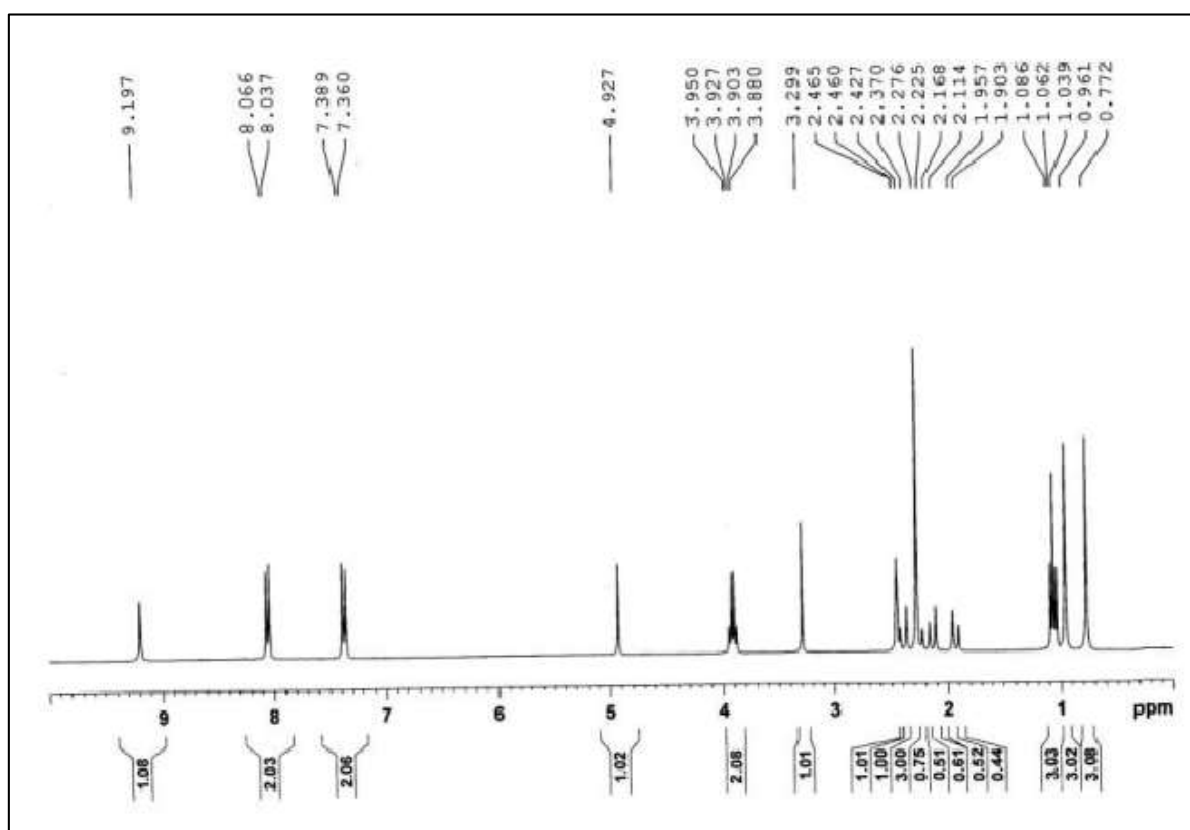

**Fig. 12.** <sup>1</sup>H NMR

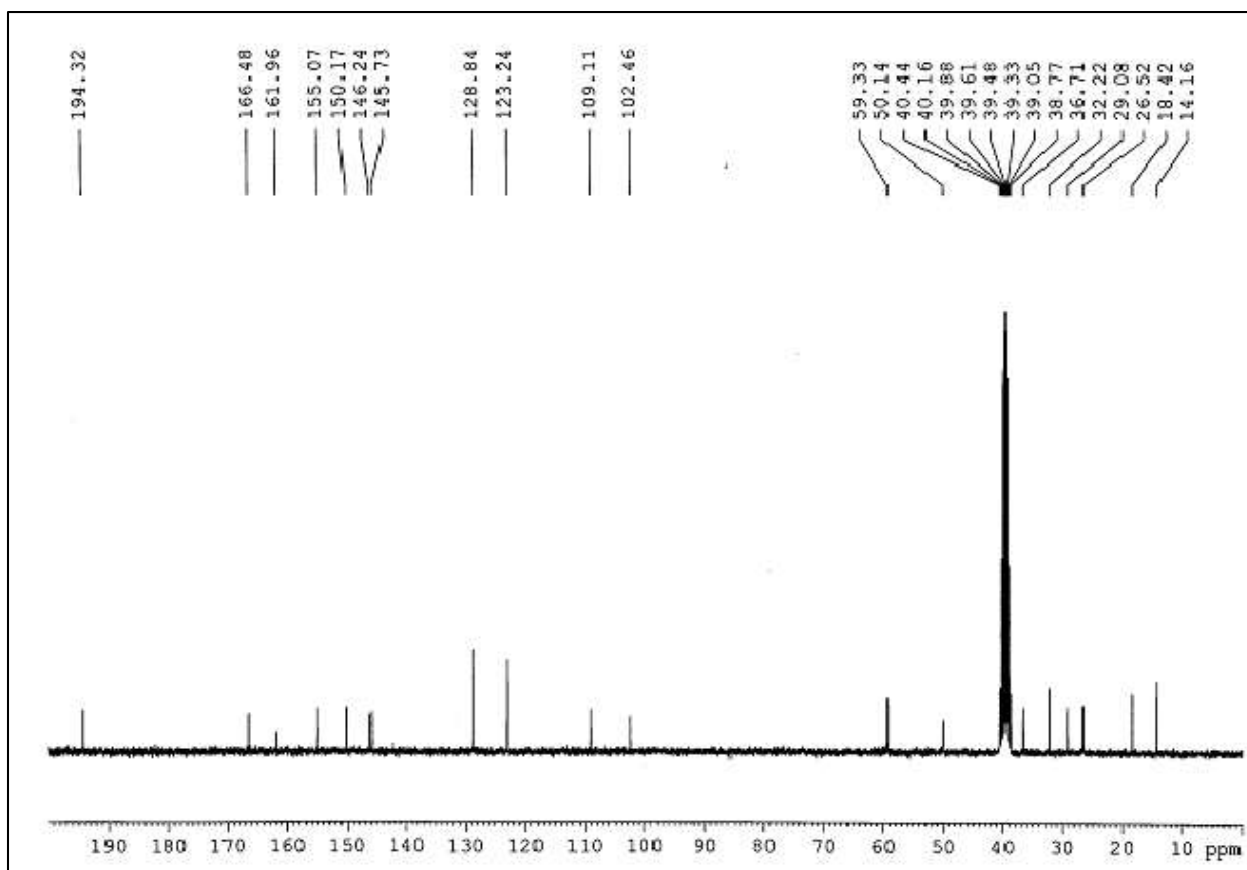

Fig. 13.  $^{13}\text{C}$  NMR

**Ethyl 4-(4-chlorophenyl)-2,7,7-trimethyl-5-oxo-1,4,5,6,7,8-hexahydroquinoline-3-carboxylate**

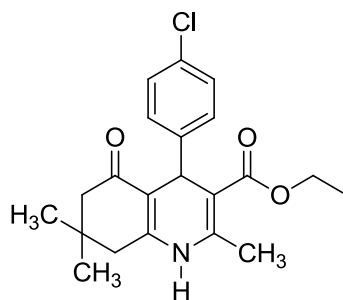

M.p. 245-247 °C, FT-IR (KBr) 3275 and 3196 (NH), 3080 and 2963 (CH), 1711 (C=O) (acid), 1605 (C=O) (ketone), 1480 (OC<sub>2</sub>H<sub>5</sub>) (ester), 1221 (OCH<sub>3</sub>) (ether) cm<sup>-1</sup>;  $\delta$ H/ ppm (400 MHz, CDCl<sub>3</sub>-d) 0.94 (s, 3H, CH<sub>3</sub>), 1.09 (s, 3H, CH<sub>3</sub>), 1.19-1.22 (t, J= 7.2 Hz, 3H, CH<sub>3</sub>-CH<sub>2</sub>-C=O), 2.14-2.36 (m, 4H, C-CH<sub>2</sub>-C=), 2.39 (s, 3H, N-C-CH<sub>3</sub>), 4.04-4.09 (q, J= 7.2 Hz, 2H, -O-CH<sub>2</sub>-CH<sub>3</sub>), 5.04 (s, 1H, CH-Ph), 6.12 (s, 1H, NH), 7.16-7.28 (m, 4H, CH (Ph));  $\delta$ C /ppm (100 MHz, CDCl<sub>3</sub>) 195.49, 167.22, 148.12, 145.56, 143.62, 131.59, 129.45, 128.0, 111.90, 105.76, 59.92, 50.86, 41.08, 36.21, 32.72, 29.43, 27.11, 19.46, 14.21.

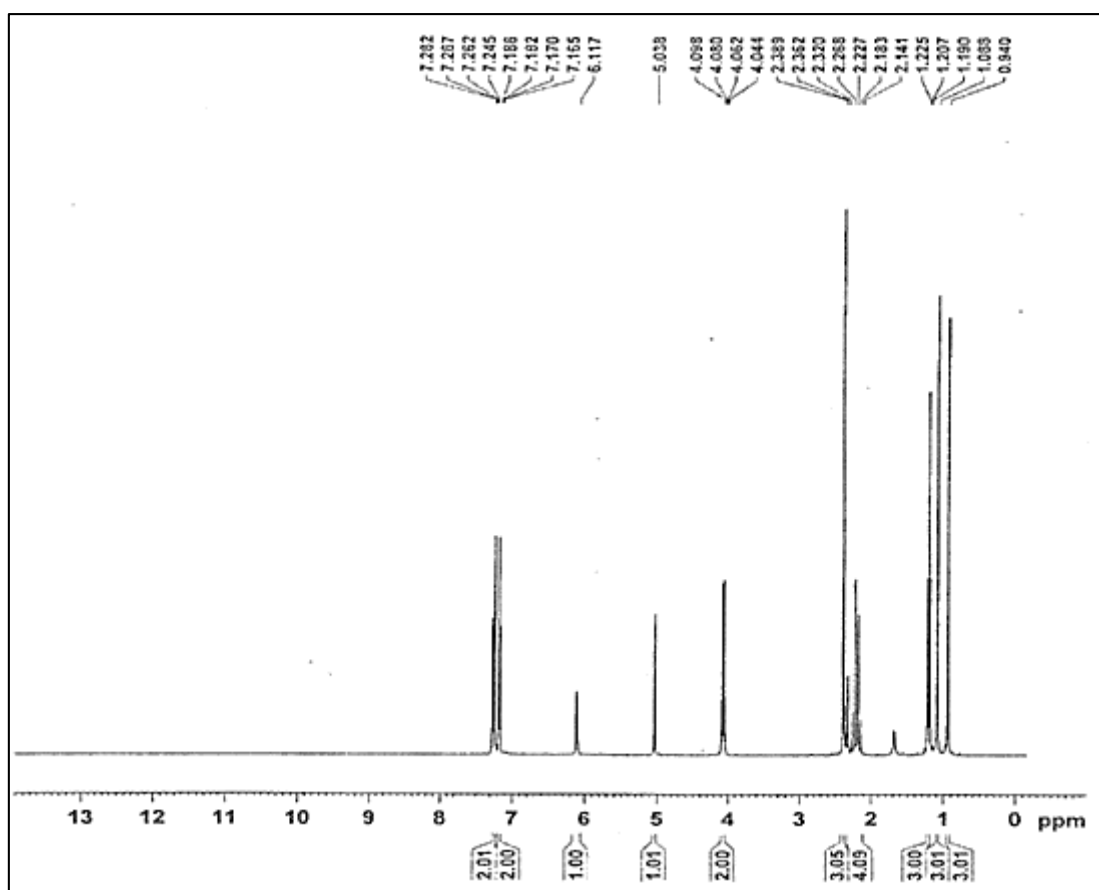

**Fig. 14.** <sup>1</sup>H NMR

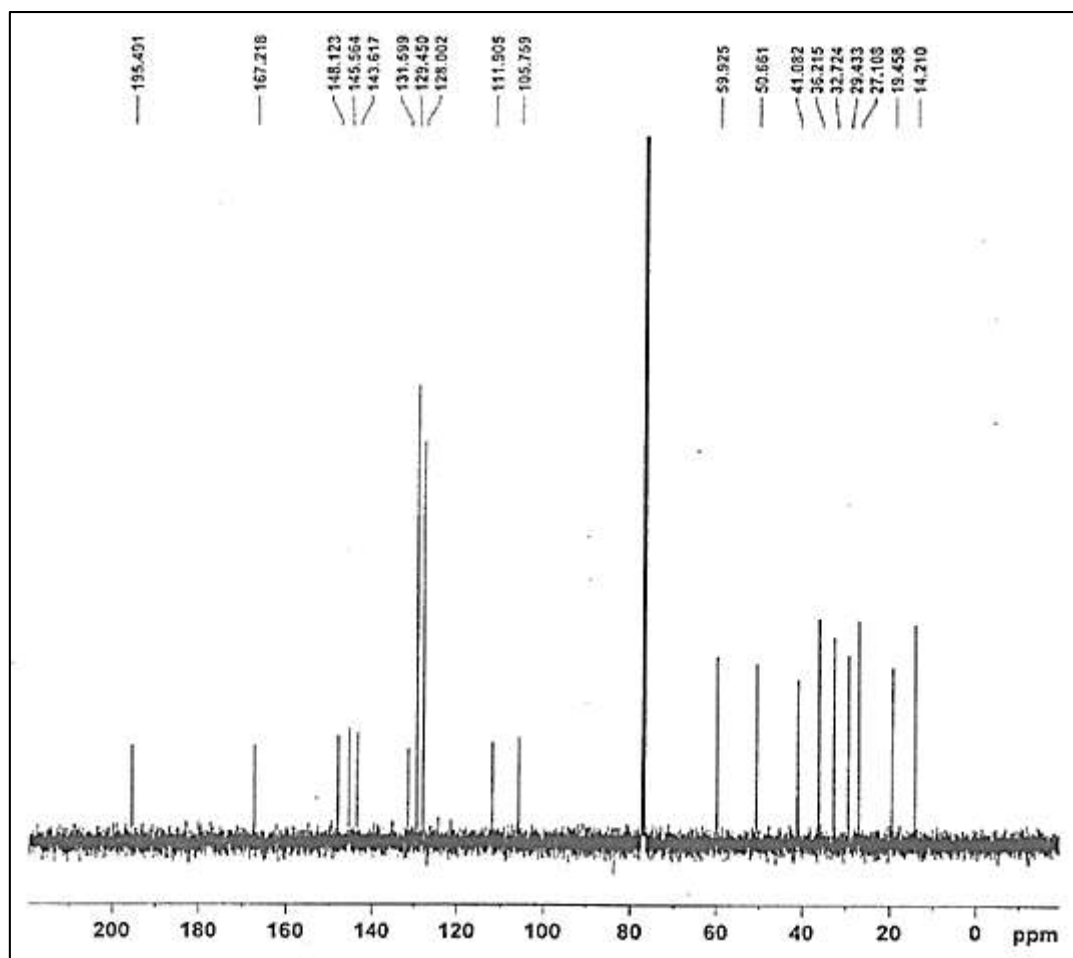

Fig. 15.  $^{13}\text{C}$  NMR



**Ethyl 4-(4-methoxyphenyl)-2,7,7-trimethyl-5-oxo-1,4,5,6,7,8-hexahydroquinoline-3-carboxylate**

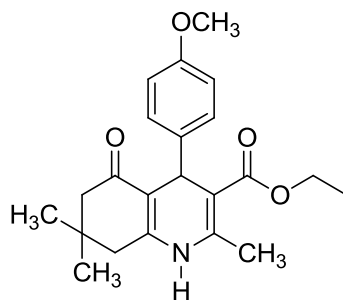

M.p. 256-258 °C, FT-IR (KBr) 3286 and 3112 (NH), 3080 and 2963 (CH), 1695 (C=O) (acid), 1615 (C=O) (ketone), 1498 (OC<sub>2</sub>H<sub>5</sub>) (ester), 1220 (OCH<sub>3</sub>) (ether) cm<sup>-1</sup>; δH/ ppm (400 MHz, CDCl<sub>3</sub>-d) 0.97 (s, 3H, CH<sub>3</sub>), 1.09 (s, 3H, CH<sub>3</sub>), 1.21-1.24 (t, J= 7.2 Hz, 3H, CH<sub>3</sub>-CH<sub>2</sub>-C=O), 2.15-2.37 (m, 4H, C-CH<sub>2</sub>-C=), 2.39 (s, 3H, N-C-CH<sub>3</sub>), 3.75 (s, 3H, H<sub>3</sub>C-O-Ph), 4.05-4.10 (q, J= 7.2 Hz, 2H, -O-CH<sub>2</sub>-CH<sub>3</sub>), 5.01 (s, 1H, CH-Ph), 5.94 (s, 1H, NH), 6.73-6.77 (m, 2H, CH-Ar), 7.21-7.28 (m, 2H, CH-Ar); δC /ppm (100 MHz, CDCl<sub>3</sub>) 195.52, 167.49, 157.75, 147.79, 142.99, 139.53, 128.98, 113.24, 112.45, 106.45, 59.83, 55.13, 50.66, 41.17, 35.67, 32.75, 29.43, 27.20, 19.49, 14.24.

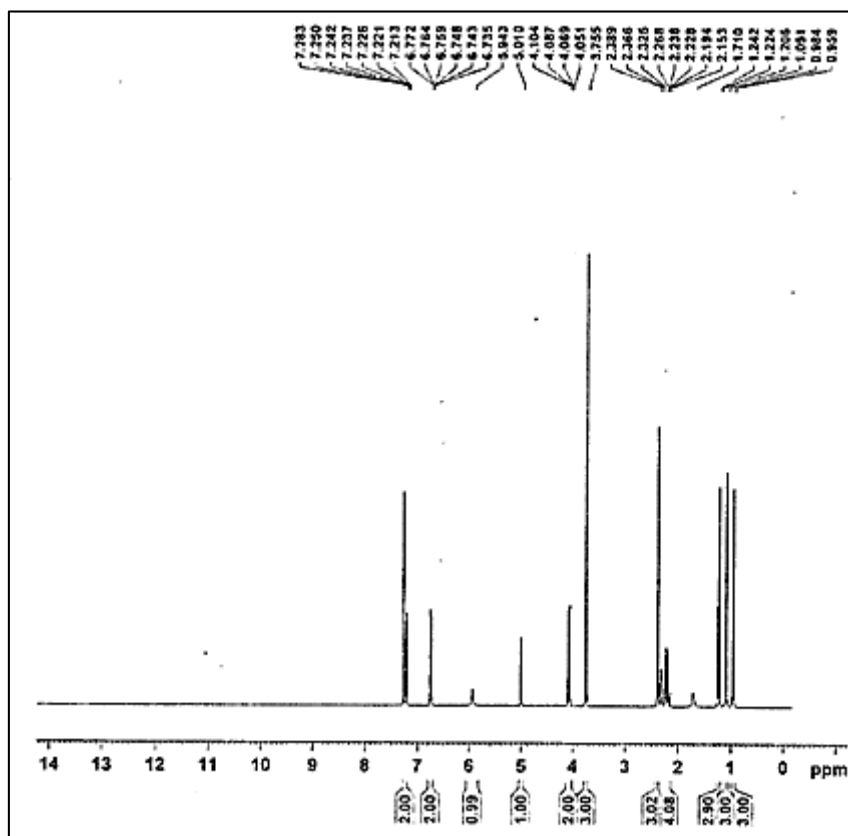

**Fig. 16.** <sup>1</sup>H NMR

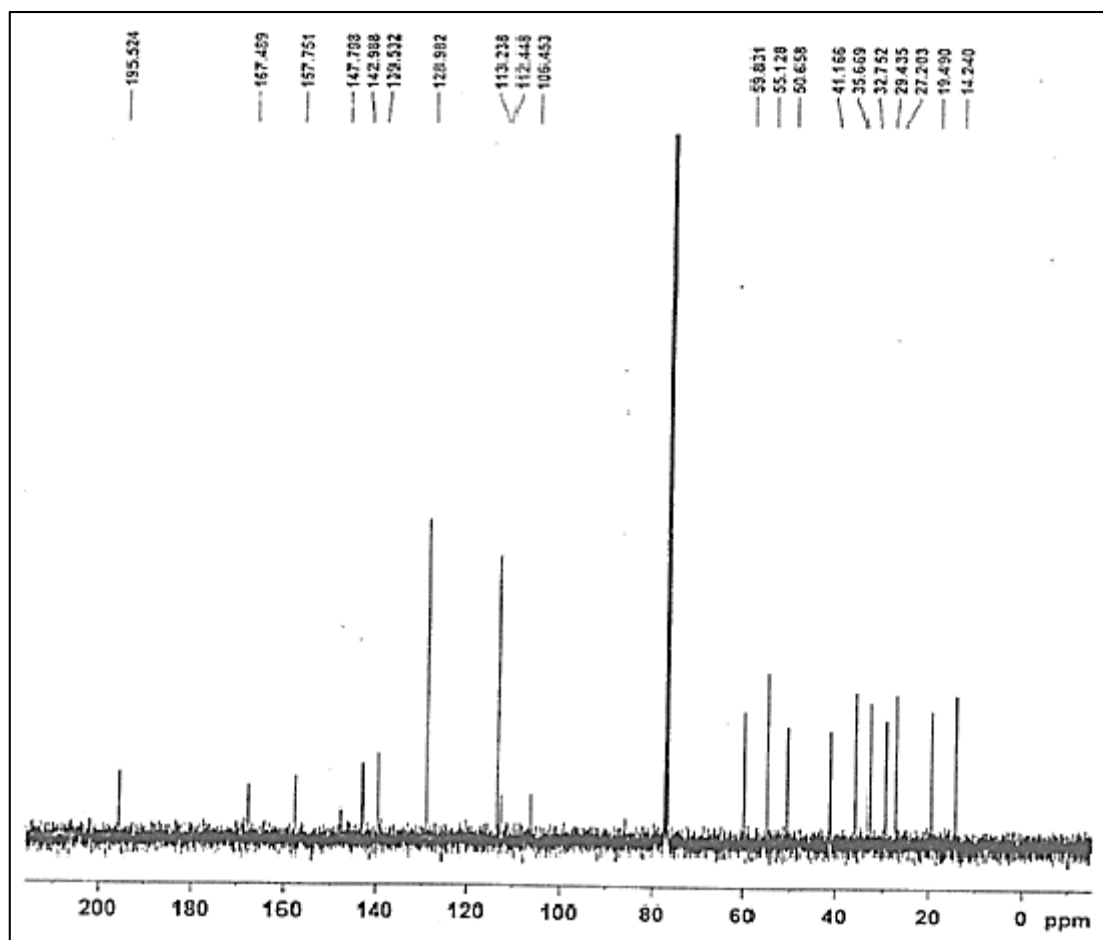

Fig. 17.  $^{13}\text{C}$  NMR

**Ethyl 2,7,7-trimethyl-5-oxo-4-(p-tolyl)-1,4,5,6,7,8-hexahydroquinoline-3-carboxylate**

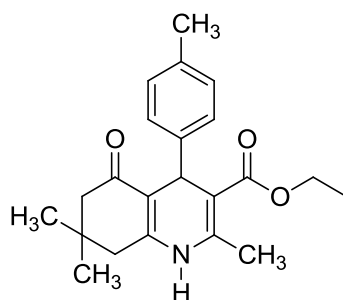

M.p. 284-285 °C, FT-IR (KBr) 3275 and 3207 (NH), 3085 and 2963 (CH), 1700 (C=O) (acid), 1610 (C=O) (ketone), 1494 (OC<sub>2</sub>H<sub>5</sub>) (ester), 1222 (OCH<sub>3</sub>) (ether) cm<sup>-1</sup>;  $\delta$ H/ ppm (400 MHz, CDCl<sub>3</sub>-d) 0.96 (s, 3H, CH<sub>3</sub>), 1.08 (s, 3H, CH<sub>3</sub>), 1.21-1.25 (t, J= 7.2 Hz, 3H, CH<sub>3</sub>-CH<sub>2</sub>-C=O), 2.14-2.24 (m, 3H, C-CH<sub>2</sub>-C=), 2.27 (s, 3H, N-C-CH<sub>3</sub>), 2.29-2.33 (t, J= 7.6 Hz, 1H, C-CH<sub>2</sub>-C=), 2.36 (s, 3H, H<sub>3</sub>C-Ph), 4.05-4.10 (m, 2H, -O-CH<sub>2</sub>-CH<sub>3</sub>), 5.02 (s, 1H, CH-Ph), 6.18 (s, 1H, NH), 7.00-7.02 (d, J= 7.6 Hz, 2H, CH-Ar), 7.19-7.21 (d, J= 8 Hz, 2H, CH-Ar);  $\delta$ C /ppm (100 MHz, CDCl<sub>3</sub>) 195.64, 167.53, 148.15, 144.15, 143.27, 135.40, 128.61, 127.88, 112.28, 106.25, 59.83, 50.73, 41.1, 36.07, 32.72, 29.42, 27.23, 21.05, 19.4, 14.22.

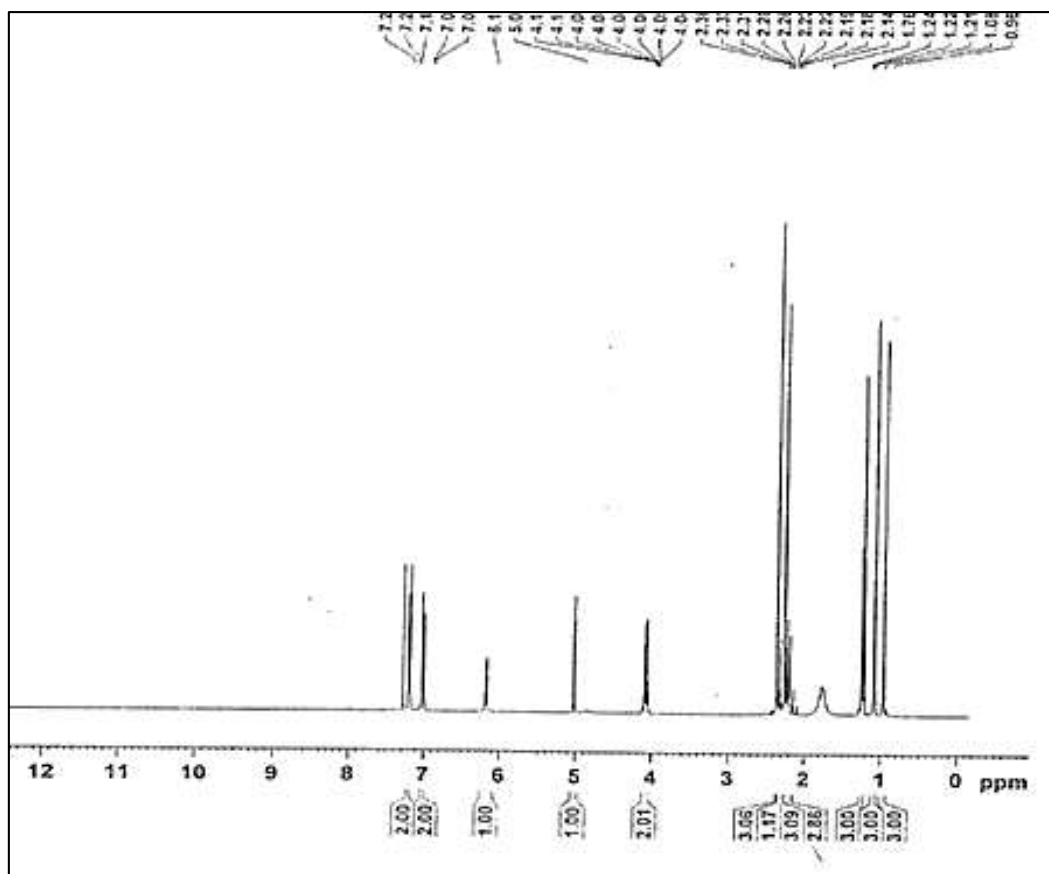

**Fig. 18.** <sup>1</sup>H NMR

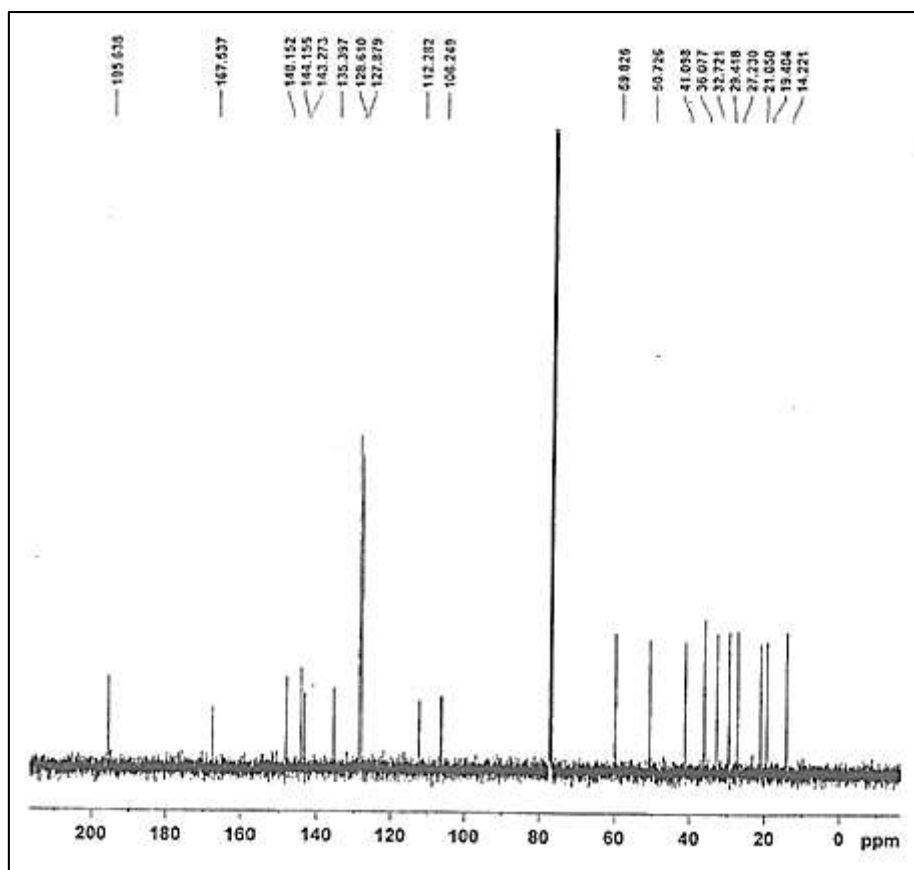

Fig. 19.  $^{13}\text{C}$  NMR

**Ethyl 2-methyl-5-oxo-4,7-diphenyl-1,4,5,6,7,8-hexahydroquinoline-3-carboxylate**

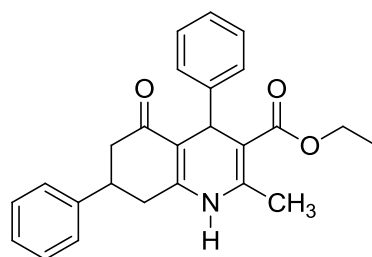

M.p. 213-214 °C,  $\nu_{\max}$  (KBr) 3276 (NH), 1701 (C=O) (acid), 1606 (C=O) (ketone), 1487 (OC<sub>2</sub>H<sub>5</sub>) (ester), cm<sup>-1</sup>;  $\delta_{\text{H}}$  (400 MHz, DMSO-*d*<sub>6</sub>) 1.14 (t, 3H, CH<sub>3</sub>-CH<sub>2</sub>-O-C=O), 2.32 (s, 3H, CH<sub>3</sub>), 2.35 (dd, 1H, 8 H), 2.5 (d, 1H, 8 H), 2.59 (m, 1H, 7 H), 2.68 (dd, 1H, 6 H), 2.79 (dd, 1H, 6 H), 3.17 (s, 1H, NH), 4.0 (q, 2H, -O-CH<sub>2</sub>-CH<sub>3</sub>), 4.98 (s, 1H, 4 H), 7.11 (m, 1H, 4'H), 7.19-7.24 (q, 5H, 2', 4', 6', 2'', 6''H), 7.3-7.36 (m, 4H, 3', 5', 3'', 5'' H), 9.21 (s, 1H, NH) ppm;  $\delta_{\text{C}}$  (100 MHz, DMSO-*d*<sub>6</sub>) 194.4 (C-5), 167.3 (C=OOC<sub>2</sub>H<sub>5</sub>), 151.1 (C-2), 148.1 (C-1a), 145.3 (C-1''), 143.9 (C-1'), 128.9 (C-2' and C-6'), 128.3 (C-3' and C-5'), 127.9 (C-3'' and C-5''), 127.4 (C-2'' and C-6''), 127 (C-4''), 126.2 (C-4'), 111.2 (C-5a), 104.2 (C-3), 59.5 (O-CH<sub>2</sub>-CH<sub>3</sub>), 44.4 (C-6), 38.8 (C-4), 36.2 (C-8), 34 (C-7), 18.7 (1C, CH<sub>3</sub>), 14.6 (1C, CH<sub>3</sub>-CH<sub>2</sub>O).

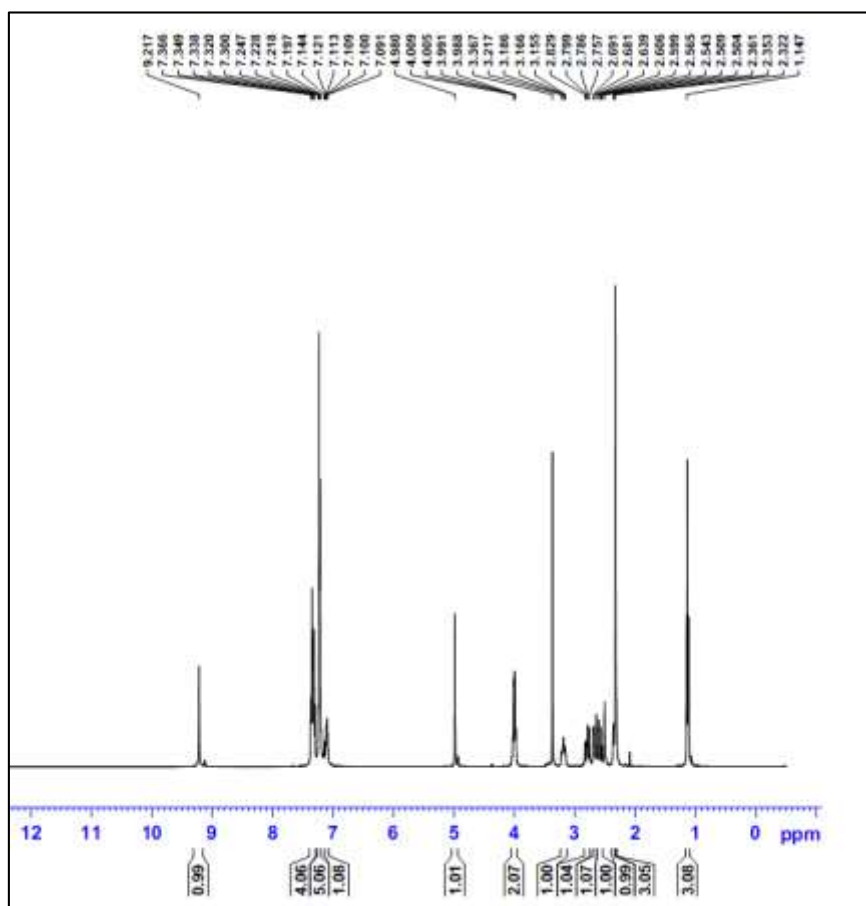

**Fig. 20.** <sup>1</sup>H NMR

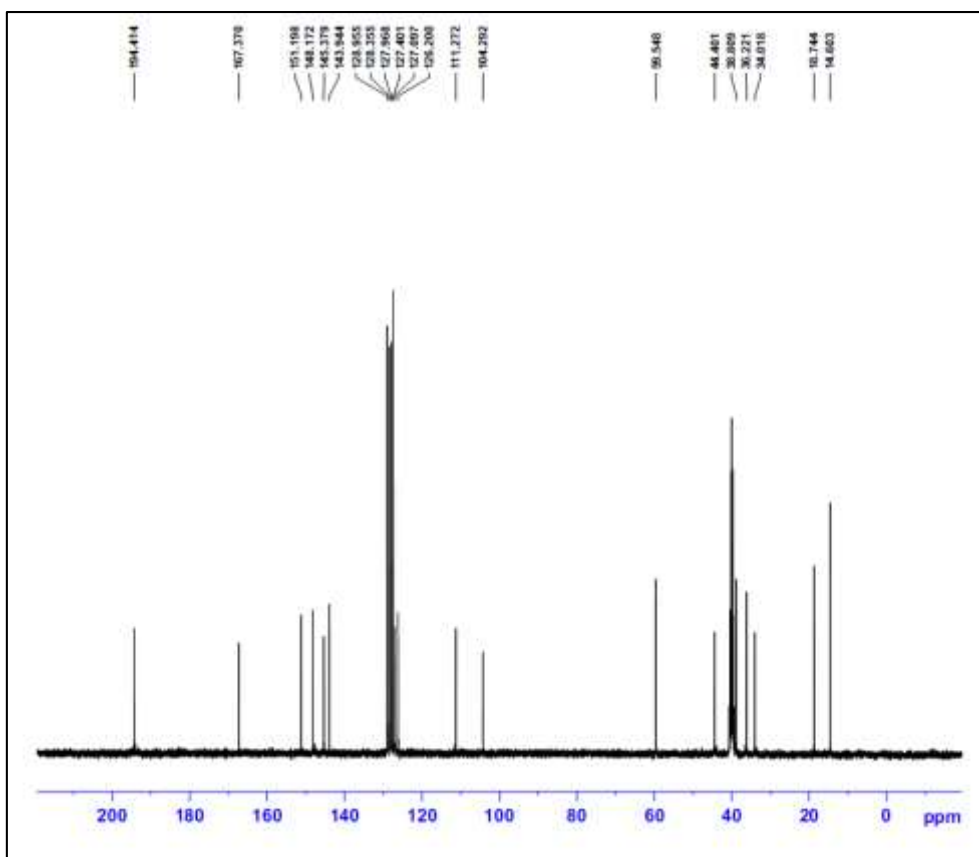

Fig. 21.  $^{13}\text{C}$  NMR
